# Supplementary material for: Coagulation factors directly cleave SARS-CoV-2 spike and enhance viral entry
Source: eLife. 2022 Mar 23;11:e77444. doi: 10.7554/eLife.77444 (PMC8942469; doi:10.7554/eLife.77444)
Supplement: Figure 1—source data 1. [file elife-77444-fig1-data1.xlsx]

## Sheet: Figure 1B
Condition	replicate 1	replicate 2	replicate 3	mean	p-value*	significant
VEH	1.03165	1.00531	0.991796	1.00958	NA	NA
Camostat	0.02474	0.0251622	0.0292152	0.0263725	1.24e-07	*
Nafamostat	0.0241489	0.02474	0.0253311	0.02474	1.2e-07	*
Argatroban	1.04617	0.978623	0.990191	1.005	0.8572	ns
Bivalirudin	1.08121	1.01113	1.00117	1.03117	0.4804	ns
Dabigatran etexilate	1.00759	1.00319	0.998635	1.00314	0.6192	ns
Edoxaban	1.04043	0.983436	0.974993	0.99962	0.6952	ns
Betrixaban	1.11685	1.00978	0.997706	1.04144	0.4665	ns
Rivaroxaban	1.04685	0.964438	0.970264	0.99385	0.6165	ns
Apixaban	1.07176	0.991204	0.997031	1.02	0.7329	ns
Otamixaban	0.134255	0.124207	0.123869	0.127443	2.18e-07	*
Simeprevir	1.07353	1.03452	1.03359	1.04721	0.0994	ns
Telaprevir	1.02498	1.02616	1.00649	1.01921	0.51	ns
Boceprevir	1.01873	1.00058	1.01417	1.01116	0.9087	ns
Sivelestat	0.975415	0.958021	0.954474	0.962637	0.0247	*
*2-tailed, unpaired t-test, with respect to vehicle
3 biological replicates

## Sheet: Figure 1C
Condition	replicate 1	replicate 2	replicate 3	mean	p-value*	significant
VEH	0.958799	0.987934	1.05327	1	NA	NA
Dabigatran (active)	0.650677	0.663037	0.678929	0.664214	0.0003	*
*2-tailed, unpaired t-test, with respect to vehicle
3 biological replicates

## Sheet: Figure 1E
Condition	replicate 1	replicate 2	replicate 3	mean	p-value*	significant
VEH	0.798218	1.38068	0.821102	1	NA	NA
Camostat	0.0327973	0.0829458	0.0892486	0.0683306	0.00821705	*
Nafamostat	0.11349	0.108408	0.0607178	0.0942052	0.00905359	*
Argatroban	1.53491	1.34542	0.362915	1.08108	0.85292	ns
Bivalirudin	1.6814	1.09132	0.346351	1.03969	0.930999	ns
Dabigatran etexilate	0.0864936	0.1474	0.194422	0.142772	0.01132	*
Edoxaban	1.56806	1.24845	0.370296	1.06227	0.885416	ns
Betrixaban	3.79142	1.27558	0.356475	1.80783	0.482324	ns
Rivaroxaban	1.55928	1.13193	0.306458	0.999222	0.998592	ns
Apixaban	1.51031	1.34109	0.316029	1.05581	0.900448	ns
Otamixaban	0.424078	0.809831	0.659864	0.631258	0.170665	ns
Simeprevir	1.72226	1.50281	0.563435	1.26283	0.550051	ns
Telaprevir	1.03806	1.07265	0.40335	0.838019	0.605234	ns
Boceprevir	0.789844	1.43953	1.04668	1.09202	0.748853	ns
Sivelestat	0.752769	1.44288	0.818598	1.00475	0.987761	ns
*2-tailed, unpaired t-test, with respect to vehicle
3 biological replicates

## Sheet: Figure 1F
Condition	replicate 1	replicate 2	replicate 3	mean	p-value*	significant
VEH	1.0051	1.02991	0.964994	1	NA	NA
Camostat	0.975706	1.02743	0.979217	0.994119	0.827083	ns
Nafamostat	1.0577	1.01166	1.03742	1.03559	0.198728	ns
Argatroban	0.96317	0.998518	0.908202	0.95663	0.251403	ns
Bivalirudin	0.983852	0.942252	0.907172	0.944426	0.129114	ns
Dabigatran etexilate	0.860784	1.01706	0.9455	0.941116	0.29547	ns
Edoxaban	1.04454	0.9882	1.01451	1.01575	0.562187	ns
Betrixaban	1.12087	0.954927	1.00588	1.02723	0.632028	ns
Rivaroxaban	1.02856	0.950045	0.945299	0.974633	0.484462	ns
Apixaban	0.974092	1.02193	1.00672	1.00091	0.971013	ns
Otamixaban	0.922004	1.05698	1.03418	1.00439	0.928258	ns
Simeprevir	1.04043	0.970938	1.01995	1.01044	0.728001	ns
Telaprevir	1.01103	0.979134	1.03654	1.0089	0.741427	ns
Boceprevir	0.998833	0.94072	1.04234	0.993965	0.871431	ns
Sivelestat	0.902194	0.933171	0.948372	0.927912	0.0363723	*
*2-tailed, unpaired t-test, with respect to vehicle
3 biological replicates

## Sheet: Figure 1G
Concentration (uM)	Camostat			Nafamostat			Dabigatran etexilate			Otamixaban				p-values (Camostat)	p-values (Nafamostat)	p-values (Dabigatran etexilate)	p-values (Otamixaban)
20	0.036203	0.023797	0.014272	0.046265	0.026529	0.070599	0.304541	0.233543	0.357402	0.464138	0.544396	0.612878		0.00621505	0.0223806	0.00536543	0.00703709
10	0.032359	0.026351	0.013276	0.039727	0.030535	0.061918	0.960585	0.830623	0.810071	0.810434	0.694763	0.75993		0.00619493	0.0220617	0.368979	0.0467612
5	0.066202	0.038234	0.015926	0.030447	0.021365	0.054037	1.01899	0.869837	1.0433	0.766754	0.909729	0.983367		0.00663647	0.0214255	0.874218	0.32752
2.5	0.119548	0.090701	0.056653	0.028029	0.029909	0.057995	0.812768	1.02098	0.891176	0.779218	0.965257	1.0947		0.00803436	0.0216676	0.539558	0.681121
1.25	0.170347	0.13901	0.106192	0.054835	0.050249	0.118395	1.1339	0.835425	0.998893	0.92685	1.01285	0.990962		0.00977617	0.0246889	0.947063	0.79565
0.625	0.368284	0.414117	0.296261	0.137068	0.160016	0.250408	0.978402	0.901765	1.27931	0.880627	1.07966	1.08365		0.0271676	0.0367901	0.767882	0.894736
0.3125	0.748857	0.701014	0.348671	0.222709	0.311015	0.67183	1.11892	0.985497	1.05688	0.793705	1.13726	1.09158		0.148191	0.113887	0.697278	0.957917
0.15625	1.09434	0.942817	0.489898	0.529545	0.472621	1.00472	1.21194	0.778744	1.11509	0.882903	1.20138	1.07181		0.575888	0.348898	0.853977	0.691441
0.078125	1.12886	1.07545	0.492328	0.541852	0.51355	1.14071	1.25571	1.00381	1.13056	0.888722	1.16201	1.14738		0.73196	0.466112	0.413411	0.6088
0	1.18305	1.18688	0.630065	0.875742	0.61982	1.50444	1.14768	0.756533	1.09578	0.850532	1.12126	1.02821		NA	NA	NA	NA
*2-tailed, unpaired t-test, with respect to vehicle
3 biological replicates

## Sheet: Figure 1H
sgRNA	replicate 1	replicate 2	replicate 3	p-value*	significant
CD4	1.19312	1.01226	0.953938	NA	NA
PHGDH	0.773902	0.710465	1.42057	NA	NA
TMPRSS2	0.318426	0.349521	0.349356	0.00384297	*
TMPRSS2	0.190995	0.165394	0.193885	0.00122147	*
ACE2	0.530398	0.507019	0.605146	0.0228288	*
ACE2	0.254294	0.41997	0.334254	0.00413331	*
*2-tailed, unpaired t-test, with respect to control sgRNAs (CD4 & PHGDH, pooled)
3 biological replicates

## Sheet: Figure 1I
	VEH			Camostat			Nafamostat
CD4	1.19312	1.01226	0.953938	0.866711	0.795082	0.908125	0.869436	0.574882	0.485146
TMPRSS2 (g1)	0.318426	0.349521	0.349356	0.397458	0.418338	0.381498	0.400826	0.307406	0.27188
TMPRSS2 (g2)	0.190995	0.165394	0.193885	0.164383	0.141217	0.130978	0.337391	0.172432	0.141383
Group 1	Group 2	p-value*
TMPRSS(g1)_VEH	CD4_VEH	0.000603923
TMPRSS(g2)_VEH	CD4_VEH	0.000277858
CD4_Camostat	CD4_VEH	0.0681911
CD4_Nafamostat	CD4_VEH	0.0398873
TMPRSS(g1)_Camostat	TMPRSS(g1)_VEH	0.015615
TMPRSS(g1)_Nafamostat	TMPRSS(g1)_VEH	0.771098
TMPRSS(g2)_Camostat	TMPRSS(g2)_VEH	0.0474459
TMPRSS(g2)_Nafamostat	TMPRSS(g2)_VEH	0.613402
*2-tailed, unpaired t-test
3 biological replicates
