# Supplementary material for: Coagulation factors directly cleave SARS-CoV-2 spike and enhance viral entry
Source: eLife. 2022 Mar 23;11:e77444. doi: 10.7554/eLife.77444 (PMC8942469; doi:10.7554/eLife.77444)
Supplement: Figure 2—source data 1. [file elife-77444-fig2-data1.xlsx]

## Sheet: Figure 2A
TMPRSS2	V0 (µM/s
[Substrate] (µM)	S1S2	S2p
160	0.000629	0.000325
80	0.000631	0.00027
40	0.000493	0.000197
20	0.000349	0.000103
10	0.000207	5.33e-05
5	9.56e-05	2.47e-05
0	0	0

## Sheet: Figure 2B
Factor Xa	V0 (µM/s
[Substrate] (µM)	S1S2	S2p
160	0.018114	3.63e-05
80	0.014328	6.55e-06
40	0.011391	3.6e-05
20	0.007606	3.93e-05
10	0.004333	2.72e-05
5	0.002373	1.23e-05
0	7.17765e-08	3.71109e-10
data representative of 2 independent experiments

## Sheet: Figure 2C
Thrombin	V0 (µM/s
[Substrate] (µM)	S1S2	S2p
160	0.005318	0.000606
80	0.005769	0.000679
40	0.005151	0.000592
20	0.003574	0.000424
10	0.002174	0.000296
5	0.001264	0.00016
0	0	2.82294e-06
data representative of 2 independent experiments

## Sheet: Figure 2D
kcat(s-1)	TMPRSS2	FXa	THRB
S1S2	0.006169	0.1789	0.05196
S2p	0.00368	0.0002433	0.005874
data representative of 2 independent experiments

## Sheet: Figure 2E
Km (µM)	TMPRSS2	FXa	THRB
S1S2	24.71	40.35	16.34
S2p	60.94	2.711	13.98
data representative of 2 independent experiments

## Sheet: Figure 2F
ksp (s-1 µM-1)	TMPRSS2	FXa	THRB
S1S2	0.000249656	0.00443371	0.00317993
S2p	6.03873e-05	8.97455e-05	0.000420172
data representative of 2 independent experiments

## Sheet: Figure 2G
TMPRSS2 V0 (µM/S)		[Substrate] (µM)
		160	80	40	20	10	5	0
S1S2		0.000629	0.000631	0.000493	0.000349	0.000207	9.56e-05	0
S2p		0.000325	0.00027	0.000197	0.000103	5.33e-05	2.47e-05	0
THRB-R271		0.000523	0.000609	0.000602	0.000444	0.000299	0.000169	0
FGB-R44		0.000426	0.000459	0.000547	0.000583	0.000486	0.000368	0

## Sheet: Figure 2H
Factor Xa V0 (µM/S)		[Substrate] (µM)
		160	80	40	20	10	5	0
S1S2		0.01392	0.011461	0.007747	0.005139	0.002792	0.001728	0
S2p		0.000125	0.000145	0.000155	8.27e-05	5.07e-05	4.27e-05	0
THRB-R271		0.001444	0.001472	0.001355	0.001071	0.000632	0.00038	0
FGB-R44		6.13e-05	4.8e-05	2.53e-05	6.67e-06	0	0	0
data representative of 2 independent experiments

## Sheet: Figure 2I
Thrombin V0 (µM/S)		[Substrate] (µM)
		160	80	40	20	10	5	0
S1S2		0.004131	0.0045	0.003844	0.002774	0.001612	0.00096	1.27e-05
S2p		0.000577	0.000613	0.000524	0.000389	0.000221	0.000118	0
THRB-R271		0.000131	0.000188	0.000163	0.000144	6.99e-05	5.85e-05	0
FGB-R44		0.019948	0.01887	0.019911	0.013191	0.007523	0.005898	5.08e-06
data representative of 2 independent experiments
