# Supplementary material for: Coagulation factors directly cleave SARS-CoV-2 spike and enhance viral entry
Source: eLife. 2022 Mar 23;11:e77444. doi: 10.7554/eLife.77444 (PMC8942469; doi:10.7554/eLife.77444)
Supplement: Figure 3—source data 1. [file elife-77444-fig3-data1.xlsx]

## Sheet: Figure 3A
Calu3 rVSVdG/SARS-CoV-2
Neon Green (Fraction Area)	replicate 1	replicate 2	replicate 3	replicate 4	mean	p-value*	significant
VEH	0.0754845	0.0800675	0.0729858	0.0809827	0.0773801	NA	NA
FXa	0.117545	0.117353	0.12857	0.131894	0.12384	3.3e-05	*
THRB	0.103843	0.111985	0.110445	0.0903035	0.104144	0.002314	*
*2-tailed, unpaired t-test, with respect to vehicle
4 biological replicates

## Sheet: Figure 3B
Calu3 rVSVdG/SARS-CoV-2
NanoLuciferase Luminescence	replicate 1	replicate 2	replicate 3	replicate 4	mean	p-value*	significant
VEH	0.963052	0.961105	0.986598	1.08924	1	NA	NA
FXa	1.3216	1.50448	1.60093	1.55644	1.49586	0.000351	*
THRB	1.29613	1.37705	1.40517	1.30842	1.34669	0.000134	*
*2-tailed, unpaired t-test, with respect to vehicle
4 biological replicates

## Sheet: Figure 3C
Calu3 rVSVdG/SARS-CoV
NanoLuciferase Luminescence	replicate 1	replicate 2	replicate 3	replicate 4	mean	p-value*	significant
Buffer	1.33289	0.916612	0.832162	0.918339	1	NA	NA
FXa	1.19406	1.33861	1.95014	1.4958	1.49465	0.0473656	*
*2-tailed, unpaired t-test, with respect to vehicle
4 biological replicates

## Sheet: Figure 3D
Calu3 rVSVdG/VSV G
NanoLuciferase Luminescence	replicate 1	replicate 2	replicate 3	replicate 4	mean	p-value*	significant
VEH	1.07925	0.978037	0.877659	1.06506	1	NA	NA
FXa	1.09627	1.07452	1.12086	0.992225	1.07097	0.238617	ns
*2-tailed, unpaired t-test, with respect to vehicle
4 biological replicates

## Sheet: Figure 3E
Calu3 HIV-1/SARS-CoV-2
NanoLuciferase Luminescence	replicate 1	replicate 2	replicate 3	replicate 4	replicate 5	replicate 6	mean	p-value*	significant
VEH	0.925987	1.40441	0.938027	0.857695	0.956723	0.917157	1.01657	NA	NA
FXa (125nM)	1.4733	1.868	1.59403	1.37673	1.92041	1.82286	1.64649	0.000272	*
FXa (250nM)	2.28419	3.04815	2.11953	1.57606	2.05635	2.08507	2.21686	0.000222	*
*2-tailed, unpaired t-test, with respect to vehicle
6 biological replicates

## Sheet: Figure 3F
A549-ACE2 HIV-1/SARS-CoV-2
NanoLuciferase Luminescence	replicate 1	replicate 2	replicate 3	replicate 4	replicate 5	mean	p-value*	significant
VEH	0.714191	1.32676	0.890904	1.07738	0.990761	1	NA	NA
FXa (125nM)	0.942613	1.11452	1.55692	1.96773	1.04863	1.32608	0.171008	ns
FXa (250nM)	1.76234	1.82909	1.74778	2.57038	1.86653	1.95522	0.000878	*
*2-tailed, unpaired t-test, with respect to vehicle
5 biological replicates

## Sheet: Figure 3G
Vero HIV-1/SARS-CoV-2
Overexpression	Exogenous Protease	replicate 1	replicate 2	replicate 3	replicate 4	replicate 5	replicate 6	mean	Compare to	p-value*	significant
EGPN-GFP	Buffer	1.12975	0.998891	1.01469	0.69282	1.05517	1.10868	1	NA	NA	NA
EGPN-GFP	FXa (125nM)	0.485999	0.993346	1.12642	1.81481	1.62517	1.05878	1.18409	EGPN-GFP+Buffer	0.3904	ns
EGPN-GFP	FXa (250nM)	2.30552	2.08151	1.69725	2.2911	1.63155	1.86304	1.97833	EGPN-GFP+Buffer	2.9e-05	*
EGPN-TMPRSS2	Buffer	1.70835	1.96479	2.92237	2.77516	1.53729	4.24009	2.52467	EGPN-GFP+Buffer	0.004488	*
EGPN-TMPRSS2	FXa (125nM)	2.10452	3.4361	8.74355	23.9238	11.7649	12.2279	10.3668	EGPN-TMPRSS2+Buffer	0.035643	*
EGPN-TMPRSS2	FXa (250nM)	4.00554	3.9562	5.01747	10.6374	19.051	9.32271	8.66505	EGPN-TMPRSS2+Buffer	0.029062	*
*2-tailed, unpaired t-test, with respect to vehicle
6 biological replicates
