# Supplementary material for: Coagulation factors directly cleave SARS-CoV-2 spike and enhance viral entry
Source: eLife. 2022 Mar 23;11:e77444. doi: 10.7554/eLife.77444 (PMC8942469; doi:10.7554/eLife.77444)
Supplement: Figure 4—source data 1. [file elife-77444-fig4-data1.xlsx]

## Sheet: Figure 4A
TMPRSS2
V0 (µM/s)
Peptide	Drug	replicate 1	replicate 2	replicate 3	mean	p-value*	significant
SARS-CoV-2 S1/S2	Vehicle	0.000322916	0.000298719	0.00029269	0.000304775	NA	NA
SARS-CoV-2 S1/S2	Camostat	8.06561e-06	2.91528e-06	6.8995e-06	5.96013e-06	5.75493e-06	*
SARS-CoV-2 S1/S2	Nafamostat	7.57973e-06	6.41362e-06	5.6362e-06	6.54318e-06	5.5249e-06	*
SARS-CoV-2 S1/S2	Otamixaban	2.70149e-05	2.81811e-05	2.4683e-05	2.66263e-05	7.42077e-06	*
SARS-CoV-2 S1/S2	Dabigatran	0.000244592	0.000263541	0.00017812	0.000228751	0.0506007	ns
SARS-CoV-2 S2'	Vehicle	8.37658e-05	8.46404e-05	9.1637e-05	8.66811e-05	NA	NA
SARS-CoV-2 S2'	Camostat	1.2147e-05	1.26329e-05	1.2439e-05	1.24063e-05	7.57995e-06	*
SARS-CoV-2 S2'	Nafamostat	1.3799e-05	1.14668e-05	1.7103e-05	1.41229e-05	1.68704e-05	*
SARS-CoV-2 S2'	Otamixaban	1.7686e-05	1.72002e-05	2.0213e-05	1.83664e-05	1.36559e-05	*
SARS-CoV-2 S2'	Dabigatran	6.88007e-05	7.19103e-05	7.7741e-05	7.28173e-05	0.018543	*

## Sheet: Figure 4B
Human Airway Trypsin-like Protease
Peptide	Drug	replicate 1	replicate 2	replicate 3	mean	p-value*	significant
SARS-CoV-2 S1/S2	Vehicle	0.00893	0.00913	0.00759	0.00855	NA	NA
SARS-CoV-2 S1/S2	Camostat	0	0	0	0	6.0052e-05	*
SARS-CoV-2 S1/S2	Nafamostat	0	0	0	0	6.0052e-05	*
SARS-CoV-2 S1/S2	Otamixaban	0.00825	0.00823	0.00724	0.00790667	0.33484	ns
SARS-CoV-2 S1/S2	Dabigatran	0.00247	0.00244	0.00228	0.00239667	0.000225972	*
SARS-CoV-2 S2'	Vehicle	0.00049793	0.000261598	0.00028754	0.000349023	NA	NA
SARS-CoV-2 S2'	Camostat	0	0	1.0689e-06	3.563e-07	0.00959361	*
SARS-CoV-2 S2'	Nafamostat	9.03737e-06	9.71761e-06	1.0301e-05	9.68533e-06	0.010539	*
SARS-CoV-2 S2'	Otamixaban	0.000358191	0.000219035	0.00023993	0.000272385	0.425516	ns
SARS-CoV-2 S2'	Dabigatran	6.19012e-05	4.81993e-05	3.7316e-05	4.91388e-05	0.0162705	*

## Sheet: Figure 4C
Factor Xa
Peptide	Drug	replicate 1	replicate 2	replicate 3	mean	p-value*	significant
SARS-CoV-2 S1/S2	Vehicle	0.015886	0.016786	0.016892	0.0165213	NA	NA
SARS-CoV-2 S1/S2	Camostat	0.014482	0.015177	0.015042	0.0149003	0.0134108	*
SARS-CoV-2 S1/S2	Nafamostat	0.005352	0.006823	0.00659	0.006255	5.09763e-05	*
SARS-CoV-2 S1/S2	Otamixaban	0.000167	0.000175	0.000178	0.000173333	8.69342e-07	*
SARS-CoV-2 S1/S2	Dabigatran	0.001395	0.001429	0.001424	0.001416	1.19455e-06	*
SARS-CoV-2 S2'	Vehicle	0.00011	0.000103	8.72e-05	0.000100067	NA	NA
SARS-CoV-2 S2'	Camostat	9.87e-05	0.000104	9.25e-05	9.84e-05	0.835405	ns
SARS-CoV-2 S2'	Nafamostat	0	7.05e-06	0	2.35e-06	0.000165197	*
SARS-CoV-2 S2'	Otamixaban	5.55e-05	5.2e-05	5.99e-05	5.58e-05	0.00340676	*
SARS-CoV-2 S2'	Dabigatran	3e-05	2.82e-05	3.17e-05	2.99667e-05	0.000504814	*

## Sheet: Figure 4D
Thrombin
Peptide	Drug	replicate 1	replicate 2	replicate 3	mean	p-value*	significant
SARS-CoV-2 S1/S2	Vehicle	0.005586	0.005613	0.005469	0.005556	NA	NA
SARS-CoV-2 S1/S2	Camostat	0.000115	0.000109	5.38e-05	9.26e-05	3.66154e-08	*
SARS-CoV-2 S1/S2	Nafamostat	0	0	0	0	2.40062e-08	*
SARS-CoV-2 S1/S2	Otamixaban	0.001505	0.001538	0.001478	0.001507	1.1331e-07	*
SARS-CoV-2 S1/S2	Dabigatran	0	0	0	0	2.40062e-08	*
SARS-CoV-2 S2'	Vehicle	0.000627	0.000645	0.000632	0.000634667	NA	NA
SARS-CoV-2 S2'	Camostat	0	0	0	0	3.06109e-08	*
SARS-CoV-2 S2'	Nafamostat	1.32e-05	0	0	4.4e-06	8.8039e-08	*
SARS-CoV-2 S2'	Otamixaban	0.0001	7.67e-05	0.0001	9.22333e-05	5.49078e-07	*
SARS-CoV-2 S2'	Dabigatran	0	0	0	0	3.06109e-08	*

## Sheet: Figure 4E
Factor Xa
Relative Activity	Camostat						Nafamostat						Otamixaban						Dabigatran
[I] µM	replicate 1	replicate 2	replicate 3	mean	p-value	significant	replicate 1	replicate 2	replicate 3	mean	p-value	significant	replicate 1	replicate 2	replicate 3	mean	p-value	significant	replicate 1	replicate 2	replicate 3	mean	p-value	significant
10	0.857486	0.864215	0.892334	0.871345	0.000640026	*	0.287992	0.309108	0.25212	0.283073	3.40263e-06	*	0.0155408	0.0141745	0.0118116	0.0138423	1.45566e-06	*	0.202012	0.199782	0.192706	0.198167	3.59009e-06	*
3.33333	0.965393	0.951694	0.986542	0.967876	0.0671751	ns	0.648745	0.695556	0.622795	0.655699	0.000131903	*	0.0159761	0.0154175	0.0110642	0.0141526	1.46492e-06	*	0.445942	0.427807	0.420077	0.431275	1.71231e-05	*
1.11111	0.977409	1.01682	0.998798	0.997677	0.875274	ns	0.956835	0.921727	0.888399	0.92232	0.0256319	*	0.0157269	0.0164744	0.0136762	0.0152925	1.46127e-06	*	0.75275	0.728669	0.717966	0.733129	0.000398434	*
0.37037	1.00192	1.02716	0.997116	1.00873	0.515159	ns	1.00161	1.00339	0.955309	0.986771	0.523549	ns	0.017033	0.0174683	0.013553	0.0160181	1.47068e-06	*	0.988505	0.98137	0.964424	0.978099	0.400013	ns
0.123457	1.01442	1.0137	1.00985	1.01266	0.191891	ns	1.03672	1.02527	1.00873	1.02358	0.151379	ns	0.0206991	0.0234343	0.019519	0.0212175	1.50094e-06	*	1.05391	0.997423	1.00902	1.02012	0.513071	ns
0.0411523	ND	ND	ND				ND	ND	ND				0.0708541	0.0568582	0.0550723				ND	ND	ND
0.0137174	ND	ND	ND				ND	ND	ND				0.157271	0.147102	0.142255				ND	ND	ND
0.00457247	ND	ND	ND				ND	ND	ND				0.357915	0.378508	0.349897				ND	ND	ND
0.00152416	ND	ND	ND				ND	ND	ND				0.539606	0.535962	0.511542				ND	ND	ND
0	1.01033	0.984379	1.00529	1	NA	NA	1.01204	1.00899	0.978969	1	NA	NA	1.03019	1.01233	0.957478	1	NA	NA	1.01229	1.03072	0.956991	1	NA	NA
ND=not determined

## Sheet: Figure 4F
Thrombin
Relative Activity	Camostat						Nafamostat						Otamixaban						Dabigatran
[I] µM	replicate 1	replicate 2	replicate 3	mean	p-value	significant	replicate 1	replicate 2	replicate 3	mean	p-value	significant	replicate 1	replicate 2	replicate 3	mean	p-value	significant	replicate 1	replicate 2	replicate 3	mean	p-value	significant
10	0.081	0.0796	0.077	0.0792	5.63504e-08	*	0.0334	0.0296	0.0194	0.0274667	3.11964e-06	*	0.374	0.393	0.36	0.375667	1.54969e-06	*	0.0141	0.0127	0.0124	0.0130667	5.0826e-07	*
3.33333	0.15	0.15	0.149	0.149667	7.50913e-08	*	0.0557	0.0536	0.0419	0.0504	3.44066e-06	*	0.595	0.716	0.605	0.638667	0.000845164	*	0.0135	0.0137	0.0133	0.0135	5.08217e-07	*
1.11111	0.351	0.359	0.35	0.353333	2.70392e-07	*	0.108	0.105	0.0949	0.102633	4.27697e-06	*	0.837	0.796	0.818	0.817	0.00031344	*	0.0125	0.0129	0.0132	0.0128667	5.07014e-07	*
0.37037	0.692	0.699	0.647	0.679333	6.57903e-05	*	0.159	0.155	0.142	0.152	5.52642e-06	*	1.06	1.12	0.948	1.04267	0.450314	ns	0.0152	0.0133	0.0135	0.014	5.10507e-07	*
0.123457	0.92	0.886	0.765	0.857	0.0396686	*	0.441	0.498	0.512	0.483667	0.000105843	*	1.11	1.05	1.11	1.09	0.0159605	*	0.0345	0.033	0.0197	0.0290667	6.29375e-07	*
0	1.01	1.01	0.983	1.001	NA	NA	1.01	1.04	0.952	1.00067	NA	NA	1.01	0.979	1.01	0.999667	NA	NA	1.03	0.996	0.972	0.999333	NA	NA

## Sheet: Figure 4G
Calu3 rVSVdG/SARS-CoV-2
	FXa									Buffer
[Nafamostat] (µM)	replicate 1	replicate 2	replicate 3	replicate 4	replicate 5	replicate 6	mean	p-value	significant	replicate 1	replicate 2	replicate 3	replicate 4	replicate 5	replicate 6	mean	p-value	significant
0	2.83829	2.71009	3.95499	2.6548	7.11338	2.11687	3.56474	NA	ns	1.0424	0.911126	1.56414	0.802732	0.847909	0.83169	1	NA	ns
0.92	0.24109	0.038701	0.282146	0.033455	0.031448	0.012766	0.106601	0.000989564	*	0.03383	0.014399	0.019404	0.005567	0.005005	0.012981	0.0151977	8.21403e-06	*
2.77	0.034044	0.015041	0.026951	0.014693	0.073628	0.01927	0.0306045	0.000835842	*	0.005139	0.04036	0.004229	0.004818	0.004737	0.006343	0.0109377	7.94591e-06	*
8.33	0.039129	0.016888	0.019029	0.01464	0.018146	0.016112	0.0206573	0.000818878	*	0.003292	0.005433	0.005299	0.00538	0.005165	0.00554	0.00501817	7.45451e-06	*
25	0.050263	0.013328	0.017905	0.015523	0.015443	0.012606	0.0208447	0.000819297	*	0.006049	0.004229	0.004255	0.005192	0.006343	0.006156	0.00537067	7.47804e-06	*

## Sheet: Figure 4H
Calu3 HIV-1/SARS-CoV-2
	FXa						Buffer
[Nafamostat] (µM)	replicate 1	replicate 2	replicate 3	mean	p-value	significant	replicate 1	replicate 2	replicate 3	mean	p-value	significant
0	2.3015	2.45967	2.88803	2.54973	NA	NA	0.976718	1.08712	0.936165	1	NA	NA
0.92	0.161688	0.207496	0.242719	0.203968	0.000186365	*	0.106381	0.065061	0.122776	0.0980727	4.82664e-05	*
2.77	0.224221	0.207959	0.28256	0.238247	0.000196988	*	0.062639	0.069942	0.14419	0.092257	6.36437e-05	*
8.33	0.254529	0.2119	0.281178	0.249202	0.00019936	*	0.071832	0.085186	0.083587	0.0802017	3.47371e-05	*
25	0.180217	0.228809	0.343204	0.250743	0.000224884	*	0.064251	0.081171	0.094142	0.0798547	3.66281e-05	*
