# Supplementary material for: Coagulation factors directly cleave SARS-CoV-2 spike and enhance viral entry
Source: eLife. 2022 Mar 23;11:e77444. doi: 10.7554/eLife.77444 (PMC8942469; doi:10.7554/eLife.77444)
Supplement: Figure 5—source data 1. [file elife-77444-fig5-data1.xlsx]

## Sheet: Figure 5A
N, MOI=0.1
	24 hours			48 hours
	Vehicle	Factor Xa	Thrombin	Vehicle	Factor Xa	Thrombin
replicate 1	0.562037	8.05198	10.7419	3.81979	13.1106	9.35833
replicate 2	0.782359	4.32725	8.92396	5.16172	6.76961	20.3069
replicate 3	1.10635	4.64643	8.48616	4.71269	21.9693	6.42621
replicate 4	1.25884	7.21514	12.6473	3.96405	10.3258	12.2199
replicate 5	1.26602	5.52615	6.66644	3.69595	13.9906	15.8939
replicate 6	1.08134	6.90428	8.93834	3.0689	13.5311	22.8108
replicate 7	1.21509	7.01243	9.6365	4.98297	21.7846	13.8131
replicate 8	1	6.04137	9.48403	3.51124	8.47263	17.4409
replicate 9	0.846845	8.96941	6.15743	5.09797	14.6199	15.423
replicate 10	1.34869	8.15867	9.25483	3.17583	15.5977	21.5111
replicate 11	1.02316	6.50184	7.75487	5.88336	26.6073	19.5781
replicate 12	1.21714	6.79864	18.0239	4.83148	15.7951	15.3392
replicate 13	0.382079	11.0638	10.8918	3.02743	12.0384	7.4054
replicate 14	0.740208	8.23724	6.37208	4.68322	13.2952	22.8955
replicate 15	1.26347	7.83516	18.373	3.0816	19.7378	7.73812
replicate 16		4.1955	9.71126	5.73356	19.5339	13.7432
mean	1.00624	6.96783	10.129	4.27698	15.4487	15.119
p-value*	NA	2.69659e-13	9.75423e-11	NA	2.91691e-09	1.02383e-08
significant	NA	*	*	NA	*	*
*2-tailed, unpaired t-test, with respect to vehicle at corresponding timepoint
data is representative of 2 independent experiments

## Sheet: Figure 5B
E, MOI=0.1
	24 hours			48 hours
	Vehicle	Factor Xa	Thrombin	Vehicle	Factor Xa	Thrombin
replicate 1	1.3683	2.11064	2.42298	2.36151	4.11064	6.74291
replicate 2	1.3359	1.76961	4.51114	3.1292	3.76961	5.19807
replicate 3	0.48529	1.9693	2.57805	3.325	4.9693	4.59203
replicate 4	0.763853	2.3258	1.3392	3.35586	3.3258	6.2482
replicate 5	0.683463	1.99055	1.4054	2.583	2.99055	7.57609
replicate 6	1.20855	2.53106	1.89547	3.26579	3.53106	4.36728
replicate 7	0.862538	2.78462	1.73812	3.51431	3.78462	4.99213
replicate 8	1	2.47263	2.74324	4.64123	4.47263	3.64616
replicate 9	0.817987	1.61986	2.35833	3.64049	5.61986	4.95667
replicate 10	1.49223	3.59773	1.30692	2.58144	4.59772	7.44526
replicate 11	1.5069	2.60729	3.42621	3.24423	4.60729	3.81178
replicate 12	1.15406	1.79508	4.21994	4.81144	2.79508	5.70444
replicate 13	1.20975	2.03836	2.89392	2.66053	5.03836	4.22552
replicate 14	0.783144	1.29525	2.81078	3.67267	3.29525	4.02286
replicate 15	0.937563	2.73782	1.81313	2.41529	5.73782	6.01654
replicate 16		1.53393	1.44087	4.57394	3.53393	6.60496
mean	1.04063	2.19872	2.43148	3.361	4.13622	5.38443
p-value*	NA	1.52809e-07	1.41164e-05	NA	0.0144025	7.11171e-06
significant	NA	*	*	NA	*	*
*2-tailed, unpaired t-test, with respect to vehicle at corresponding timepoint
data is representative of 2 independent experiments

## Sheet: Figure 5C
N, MOI=0.01
	24 hours			48 hours
	Vehicle	Factor Xa	Thrombin	Vehicle	Factor Xa	Thrombin
replicate 1	0.874146	5.22128	16.2127	2.1717	31.1012	23.1631
replicate 2	1.35067	7.53923	11.4083	2.48775	28.505	19.8796
replicate 3	1.51995	8.9386	14.6991	2.48224	9.01824	32.7973
replicate 4	1.02461	9.6516	4.45739	3.40146	12.4681	20.6888
replicate 5	0.827718	9.9811	17.5575	2.53207	13.47	20.4964
replicate 6	1.34717	6.06211	9.52813	2.96798	19.1781	28.7332
replicate 7	0.667419	6.56925	11.0901	2.83607	27.8053	13.733
replicate 8	1	6.94525	17.8111	3.23981	22.087	18.7936
replicate 9	0.982883	5.23972	15.8333	2.19966	26.3797	25.0073
replicate 10	0.645049	8.19545	9.31063	1.94172	10.9564	14.9568
replicate 11	0.966938	5.21457	4.90966	3.06479	26.3898	21.4157
replicate 12	1.55831	5.59016	8.39927	2.36049	10.0436	29.9419
replicate 13	0.862073	3.07672	6.87346	3.06799	23.6309	14.3832
replicate 14	1.11913	9.59049	11.519	2.28369	7.91833	18.4085
replicate 15	0.712497	10.4756	16.2109	3.22331	27.7547	24.8414
replicate 16		5.06786	14.3036	2.98392	31.3482	19.5475
mean	1.03057	7.08494	11.8828	2.70279	20.5034	21.6742
p-value*	NA	1.64262e-11	1.83184e-10	NA	2.55741e-09	1.82371e-14
significant	NA	*	*	NA	*	*
*2-tailed, unpaired t-test, with respect to vehicle at corresponding timepoint
data is representative of 2 independent experiments

## Sheet: Figure 5D
E, MOI=0.01
	24 hours			48 hours
	Vehicle	Factor Xa	Thrombin	Vehicle	Factor Xa	Thrombin
replicate 1	0.661496	6.79026	3.42867	1.95545	8.06124	14.8445
replicate 2	0.844885	4.69002	6.03615	1.21992	12.041	14.9065
replicate 3	1.52389	2.10241	5.43572	1.48812	7.14179	11.898
replicate 4	0.732484	6.89578	3.69157	1.57441	9.24144	14.7903
replicate 5	0.764469	7.01456	5.48293	1.23689	14.6143	9.30811
replicate 6	1.08657	3.33983	3.96727	1.95655	12.1904	16.2005
replicate 7	1.0473	4.89112	4.18824	1.79868	12.5462	15.5363
replicate 8	1	2.15692	3.48911	1.76133	9.79014	20.3289
replicate 9	0.960879	7.21385	5.75019	1.70613	11.1274	19.6482
replicate 10	1.18431	2.72778	5.02425	1.72377	9.25748	10.3519
replicate 11	1.28702	5.12579	6.27604	1.8456	10.0113	21.2946
replicate 12	0.976884	9.57601	6.09779	1.71356	13.9811	12.7545
replicate 13	1.45675	4.36334	6.01034	1.02677	12.1773	13.8004
replicate 14	0.974197	8.61503	4.47847	1.83616	10.74	9.61491
replicate 15	0.309485	7.68283	4.71186	1.96113	7.74957	15.6274
replicate 16		5.16909	3.29746	1.45485	7.02712	18.0101
mean	0.987375	5.52216	4.83538	1.64121	10.4811	14.9322
p-value*	NA	1.96177e-08	5.03979e-14	NA	1.8415e-15	4.16035e-15
significant	NA	*	*	NA	*	*
*2-tailed, unpaired t-test, with respect to vehicle at corresponding timepoint
data is representative of 2 independent experiments
